# Supplementary material
Source: PubMed Central journal article supplement (PMC3214911)
Supplement: cdd201163x3.pdf [file cdd201163x3.pdf]

## Supplemental Figure Legends

**Figure S1. Suppression of ER stress-induced apoptosis by 3'-deoxyadenosine.**

BEAS-2B cells were exposed to TM or TG with or without 3DA and subjected to phase-contrast microscopy (A) and assessment of cell death (B).

**Figure S2. Suppression of ER stress-induced apoptosis by post-treatment with 3'-deoxyadenosine.**

NRK-52E cells were pretreated with TM or TG for 8 h, treated with 3DA together with TG or TM and subjected to microscopic analysis (A) and assessment of cell death (B).

**Figure S3. Lack of involvement of A<sub>1</sub>/A<sub>2</sub> adenosine receptors in the anti-apoptotic effect of 3'-deoxyadenosine.**

NRK-52E cell were treated with TM (A) or TG (B) together with 3DA in the absence or presence of 1  $\mu$ M DPSPX, and subjected to phase-contrast microscopy.

**Figure S4. Suppression of ER stress markers by post-treatment with 3'-deoxyadenosine.**

NRK-52E cells were pretreated with TM or TG for 12 h, treated with 3DA for additional 10 h and subjected to Northern blot analysis.

**Figure S5. Lack of suppression of *SEAP* mRNA by 3'-deoxyadenosine.**

SM/SV-SEAP cells were treated with 20  $\mu$ g/ml 3DA for up to 48 h, and the level of

*SEAP* mRNA was evaluated.

**Figure S6. Lack of suppression of *EF-1 $\alpha$*  and *GAPDH* mRNAs by 3'-deoxyadenosine.** Cells were stimulated for 8 h with TG in the absence or presence of 3DA, and expression of *GRP78*, *EF-1 $\alpha$*  and *GAPDH* was evaluated by Northern blot analysis.

**Figure S7. Lack of suppression of luciferase driven by viral and house-keeping gene promoters in 3'-deoxyadenosine-treated cells.** NRK-52E cells were transiently transfected with pEF-1 $\alpha$ -Luc (left) or pCMV-Luc (right), treated with or without 3DA for 12 h and subjected to chemiluminescent assay.

**Figure S8. Phosphorylation of eIF2 $\alpha$  by salubrinal.** NRK-52E cells were treated with salubrinal, and phosphorylation of eIF2 $\alpha$  was examined.

**Figure S9. Establishment of NRK/PERK-DN cells.** (A) NRK-52E cells were stably transfected with a dominant-negative mutant of PERK (PERK-DN), and NRK/PERK-DN cells were established. Mock-transfected NRK/Neo cells and NRK/PERK-DN cells were subjected to Northern blot analysis of *PERK*. (B) NRK/Neo cells and NRK/PERK-DN cells were treated with TM or TG and subjected to Western blot analysis of phosphorylated PERK. (C) NRK/Neo cells and NRK/PERK-DN cells were transfected with pCHOP-Luc, treated with SubAB (10 ng/ml) for 12 h and

subjected to luciferase assay.

**Figure S10. Lack of attenuation of ER stress by the treatment with 3'-deoxyadenosine: assessment by ESTRAP assay.** NRK-52E cells were transiently transfected with pSEAP2-Control and pGL3-Control that introduce *SEAP* and *luciferase* under the control of the SV40 promoter. The cells were pretreated with or without 3DA for 8 h, fed with fresh medium containing TG and incubated for 4 h. After the incubation, culture media and cells were subjected to SEAP assay and luciferase assay, respectively. The values of SEAP (ESTRAP activity) were normalized by the levels of luciferase (Luc).

**Figure S11. Up-regulation of *MCP-1* mRNA by 3'-deoxyadenosine in differentiating preadipocytes.** 3T3-L1 preadipocytes were treated with differentiation medium (10  $\mu\text{g/ml}$  insulin, 0.25  $\mu\text{M}$  dexamethasone and 500  $\mu\text{M}$ , 3-isobutyl-1-methylxanthine; IDI) in the absence or presence of 100  $\mu\text{g/ml}$  3DA for 12 h, and expression of *MCP-1* was evaluated by Northern blot analysis. The level of 28S ribosomal RNA is shown at the bottom as a loading control.
