# Supplementary material
Source: PubMed Central journal article supplement (PMC3214911)

# Supplemental Data

## Fig. S4

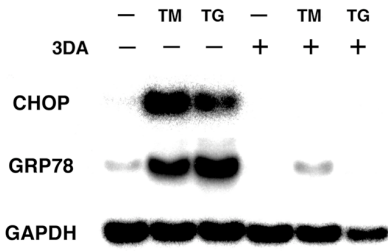

## Fig. S5

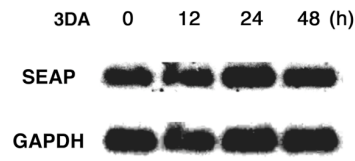

## Fig. S6

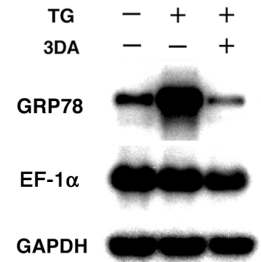

## Fig. S7

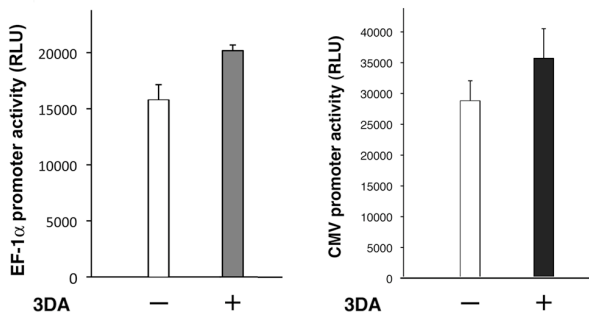

## Fig. S8

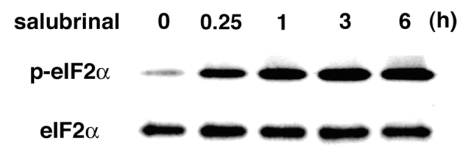

## Fig. S9

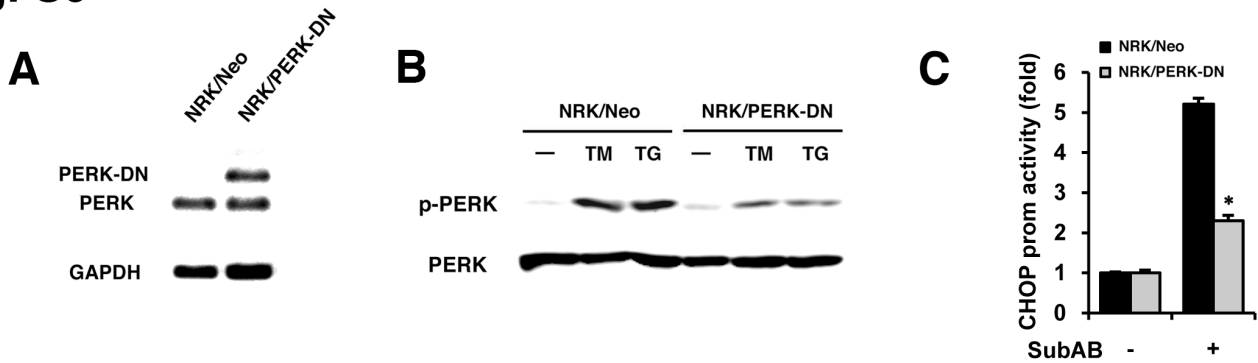

## Fig. S10

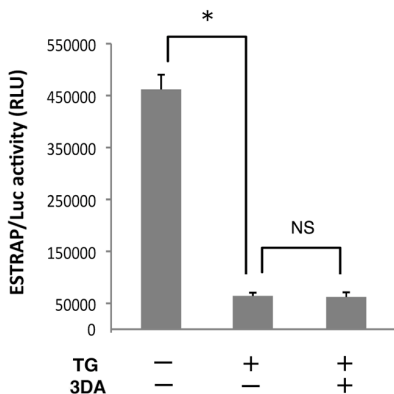

## Fig. S11

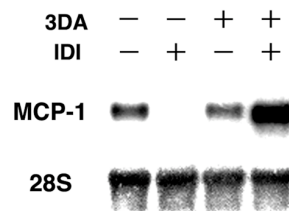

Supplement: cdd201163x2.pdf [file cdd201163x2.pdf]
